# Supplementary material for: Genetic alterations of m6A regulators predict poorer survival in acute myeloid leukemia
Source: Springer Nature journal article supplement (doi:10.1186/s13045-017-0410-6), 2017-02-02

**Fig. S7**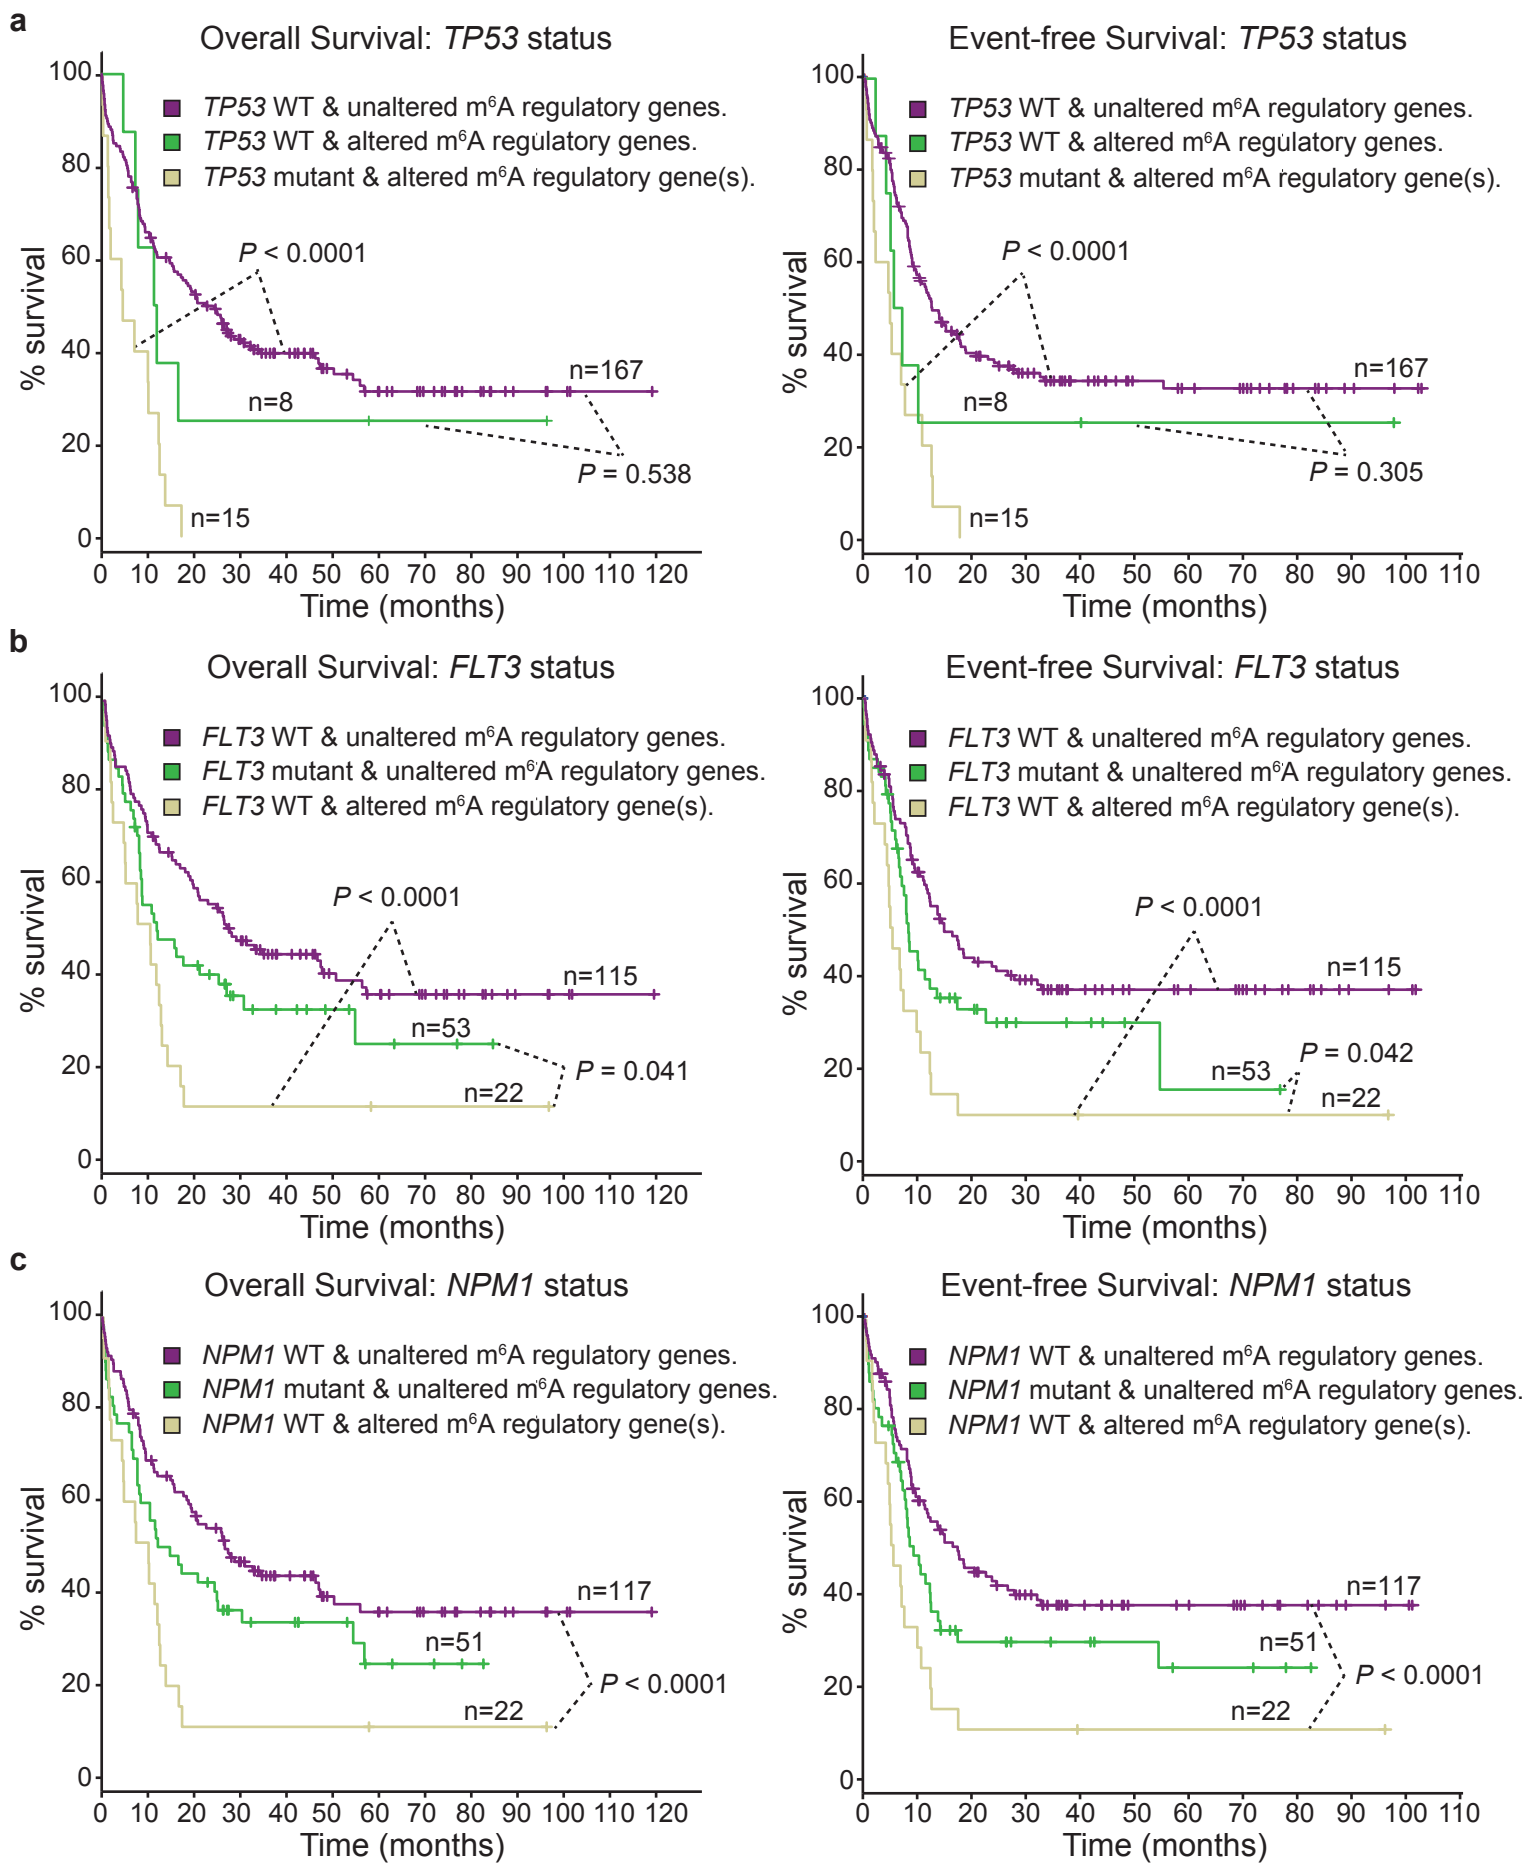

Supplement: MOESM9 [file 12043690]
